# Supplementary material for: Hematopoietic Stem Cell-Derived Adipocytes Modulate Adipose Tissue Cellularity, Leptin Production and Insulin Responsiveness in Female Mice
Source: PubMed Central journal article supplement (PMC9203959; doi:10.3389/fendo.2022.844877), 2022-06-03
Supplement: DataSheet_1.pdf [file DataSheet_1.pdf]

## SUPPLEMENTARY MATERIALS & METHODS, & DATA

### Hematopoietic Stem Cell-Derived Adipocytes Modulates Adipose Tissue Cellularity, Leptin Production, and Insulin Responsiveness in Mice.

Gavin, Sullivan, Maltzahn...Klemm

**Supplementary Table 1:** List of conventional PCR primers and sequences.

| Primer Name | Sequence (3' -> 5')                  | Description                       |
|-------------|--------------------------------------|-----------------------------------|
| oIMR7318    | CTC TGC TGC CTC CTG GCT<br>TCT       | mT/mG genotyping (common)         |
| oIMR7319    | CGA GGC GGA TCA CAA GCA<br>ATA       | mT/mG genotyping (WT R)           |
| oIMR7320    | TCA ATG GGC GGG GGT CGT T            | mT/mG genotyping (WT F)           |
| oIMR1084    | GCG GTC TGG CAG TAA AAA<br>CTA TC    | cre transgene forward             |
| oIMR1085    | GTG AAA CAG CAT TGC TGT<br>CAC TT    | cre transgene reverse             |
| oIMR7338    | CTA GGC CAC AGA ATT GAA<br>AGA TCT   | internal positive control forward |
| oIMR7339    | GTA GGT GGA AAT TCT AGC<br>ATC ATC C | internal positive control reverse |
| 13840       | CCA AAG TCG CTC TGA GTT<br>GTT ATC   | DTA wild-type forward             |
| 13841       | GAG CGG GAG AAA TGG ATA TG           | DTA wild-type reverse             |
| 12211       | CGA CCT GCA GGT CCT CG               | DTA mutant forward                |
| 8824        | CTC GAG TTT GTC CAA TTA TGT<br>CAC   | DTA mutant reverse                |

**Supplementary Table 2:** List of quantitative real-time PCR assays.

| Gene   | Vendor                      | Assay Identifier   |
|--------|-----------------------------|--------------------|
| Actb   | Qiagen                      | QT01136772         |
| Adipoq | Integrated DNA Technologies | Mm.PT.58.9719546   |
| B2m    | Integrated DNA Technologies | Mm.PT.39a.22214835 |
| B2m    | Thermo Fisher Scientific    | Mm00437762_m1      |
| EGFP   | Thermo Fisher Scientific    | Mr04329676_mr      |
| Gapdh  | Qiagen                      | QT01658692         |
| Pdk4   | Qiagen                      | QT00157248         |

**Supplementary Table 3:** Flow cytometry antibodies and fluorophore conjugates

| <b>Antibody</b>          | <b>Fluorophore</b> | <b>Vendor</b> | <b>Catalog</b>     |
|--------------------------|--------------------|---------------|--------------------|
| CD11b                    | PE/Cy7             | BioLegend     | cat no. 101215     |
| CD45                     | APC/Cy7            | BioLegend     | cat no. 103115     |
| CD29                     | PE/Cy5             | BioLegend     | cat no. 102219     |
| CD140a (Pdgfr $\alpha$ ) | APC                | BioLegend     | cat no. 135907     |
| Sca-1                    | AF700              | BioLegend     | cat no. 108141     |
| B220                     | PE/Cy5             | BioLegend     | cat no. 103209     |
| Ly6G/Ly6C (Gr-1)         | PE/Cy5             | BioLegend     | cat no. 108409     |
| Sca-1                    | BV650              | BioLegend     | cat no. 108143     |
| CD170 (Siglec-F)         | APC                | BioLegend     | cat no. 155507     |
| cKit                     | PE                 | BD Bioscience | Cat no.553869      |
| mouse FcX                | -                  | BioLegend     | cat no. 101319     |
| Compensation beads       | -                  | eBiosciences  | cat no. 01-1111-42 |

**Supplementary Table 4:** List of key resources and reagents.

| <b>Reagent Type</b>                           | <b>Description</b>                        | <b>Vendor</b>                | <b>Identifiers</b>     |
|-----------------------------------------------|-------------------------------------------|------------------------------|------------------------|
| Antibody-linked magnetic beads                | Lineage Cell Depletion Kit, mouse         | Miltenyi Biotech             | Cat. No. 130-090-858   |
| Biological molecule                           | Fibrinogen                                | Sigma Aldrich                | cat no. F8630          |
| Biological molecule                           | Thrombin                                  | Sigma Aldrich                | cat no. T9549          |
| Biological molecule                           | Bovine plasminogen                        | Enzyme Research Laboratories | cat no. BPg            |
| Biological molecule                           | Urokinase                                 | Sigma Aldrich                | cat no. U4010          |
| Cell culture reagent                          | Dulbecco's modified eagle medium          | MediaTech                    | cat no. 10-013-CV      |
| Cell culture reagent                          | Fetal bovine serum                        | GeminiBio                    | cat no. A57H74L        |
| Cell culture reagent                          | MesenCult Basal mouse media               | StemCell Technologies        | cat no. 05501          |
| Cell culture reagent                          | Stem Cell Stimulatory Supplement          | StemCell Technologies        | cat no. 05502          |
| Cell Separation Column                        | LD Columns                                | Miltenyi Biotech             | cat no. 130-042-901    |
| Chemical compound                             | DAPI                                      | Thermo Fisher Scientific     | cat no. D1306          |
| Chemical compound                             | Paraformaldehyde                          | Electron Microscopy Sciences | cat. RT 15710-S        |
| Chemical compound                             | HCS LipidTOX Deep Red Neutral Lipid Stain | Thermo Fisher Scientific     | cat no. H34477         |
| Chemical compound                             | Oil Red O                                 | Sigma Aldrich                | cat no. O0625          |
| Commercial kit                                | RNeasy Mini Kit                           | Qiagen                       | cat no. 740104         |
| Commercial kit                                | RED Extract-n-amp                         | Sigma Aldrich                | cat no. R4775          |
| Commercial Kit                                | Triglyceride Reagent                      | Pointe Scientific            | cat no. T7532120       |
| Commercial Kit                                | Triglyceride Standard                     | Pointe Scientific            | cat no. T7531-STD      |
| Commercial Kit                                | NEFA assay                                | WAKO Chemicals               | cat no. NEFA-HR(2)     |
| Consumable                                    | Adipocyte chamber slides                  | Nexcelom Bioscience          | cat no. CHT4-PD300-002 |
| Consumable                                    | Glucose test strips                       | McKesson                     | cat no. 06-R3051P-05   |
| Genetic reagent sample ( <i>M. musculus</i> ) | C57BL/6J                                  | Jackson Laboratory           | stock no. 000664       |

|                                               |                                        |                      |                       |
|-----------------------------------------------|----------------------------------------|----------------------|-----------------------|
| Genetic reagent sample ( <i>M. musculus</i> ) | ROSA <sup>mT/mG</sup>                  | Jackson Laboratory   | stock no. 007676      |
| Genetic reagent sample ( <i>M. musculus</i> ) | ROSA <sup>DTA</sup>                    | Jackson Laboratory   | stock no. 009669      |
| Genetic reagent sample ( <i>M. musculus</i> ) | AdipoQ-cre                             | Jackson Laboratory   | stock no. 010803      |
| Instrument                                    | Cell Sorter                            | Beckman Coulter      | MoFlo XDP70           |
| Instrument                                    | Fluorescent Microscope                 | Nikon                | TE2000-U              |
| Instrument                                    | Color Camera                           | Nikon                | DS-Fi2                |
| Instrument                                    | Black & White Camera                   | Nikon                | DS-QiMc               |
| Instrument                                    | Camera Control Unit                    | Nikon                | DS-U3                 |
| Instrument                                    | Imaging cytometer                      | Nexcelom Bioscience  | Cellometer Vision CBA |
| Instrument                                    | Quantitative magnetic resonance imager | EchoMRI              | EchoMRI-900           |
| Instrument                                    | Blood glucometer                       | McKesson             | True METRIX PRO       |
| Instrument                                    | Small animal indirect calorimeter      | Columbus Instruments | Oxymax - CLAMS        |
| Software                                      | Prism                                  | GraphPad             | Ver. 9.2.1            |
| Software                                      | NIS Elements-AR                        | Nikon                | Ver. 4.3.0            |
| Software                                      | Cellometer Vision                      | Nexcelom Bioscience  | Ver. 3.0.0.9          |

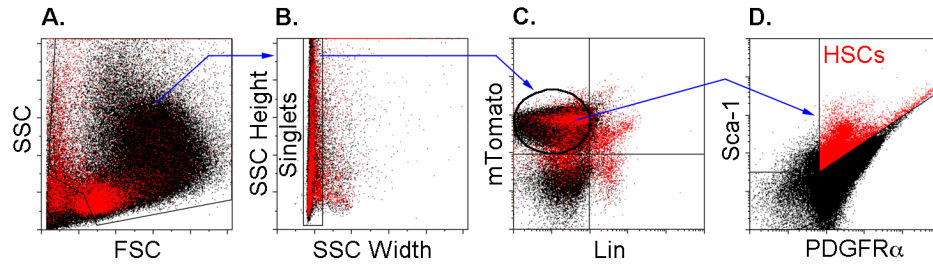

**Supplementary Figure 1. Flow cytometry gating scheme for the isolation of mouse bone marrow HSCs.** **A)** Small debris was removed from the cell population by a combination of forward scatter (FSC) and side scatter (SSC) gating. **B)** Single cells are isolated from clusters of cells by SSC Height versus SSC Width gating. **C)** Cells expressing the mTomato reporter gene but lacking mature hematopoietic Lin(eage) markers were separated from Lin<sup>POS</sup> and mTomato<sup>NEG</sup> populations. **D.** Lin<sup>NEG</sup> cells expressing both Sca-1 and PDGFR $\alpha$  were isolated as murine hematopoietic stem cells (HSCs). The mTomato marker was included in the analysis to ensure that transplanted HSCs and their HSCDA progeny could be identified based on mTomato or mGFP expression, respectively.

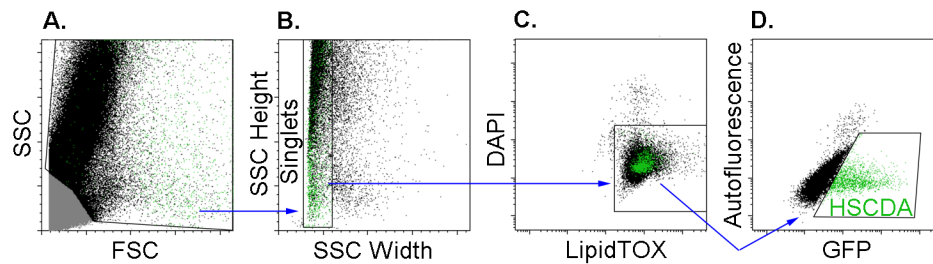

**Supplementary Figure 2. Flow cytometry gating scheme for the isolation and quantitation of HSCDAs.** **A)** Small debris was removed from the cell population by a combination of forward scatter (FSC) and side scatter (SSC) gating. **B)** Single cells are isolated from clusters of cells by SSC Height versus SSC Width gating. **C)** Live cells were identified by their lack of DAPI fluorescence, and high lipid content was confirmed by staining with LipidTOX. **D)** Finally, HSCDAs were identified by their GFP fluorescence from the autofluorescent conventional adipocyte population.

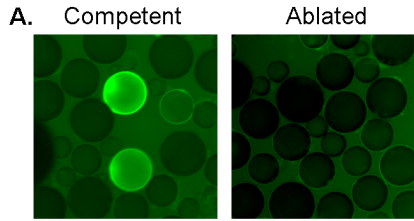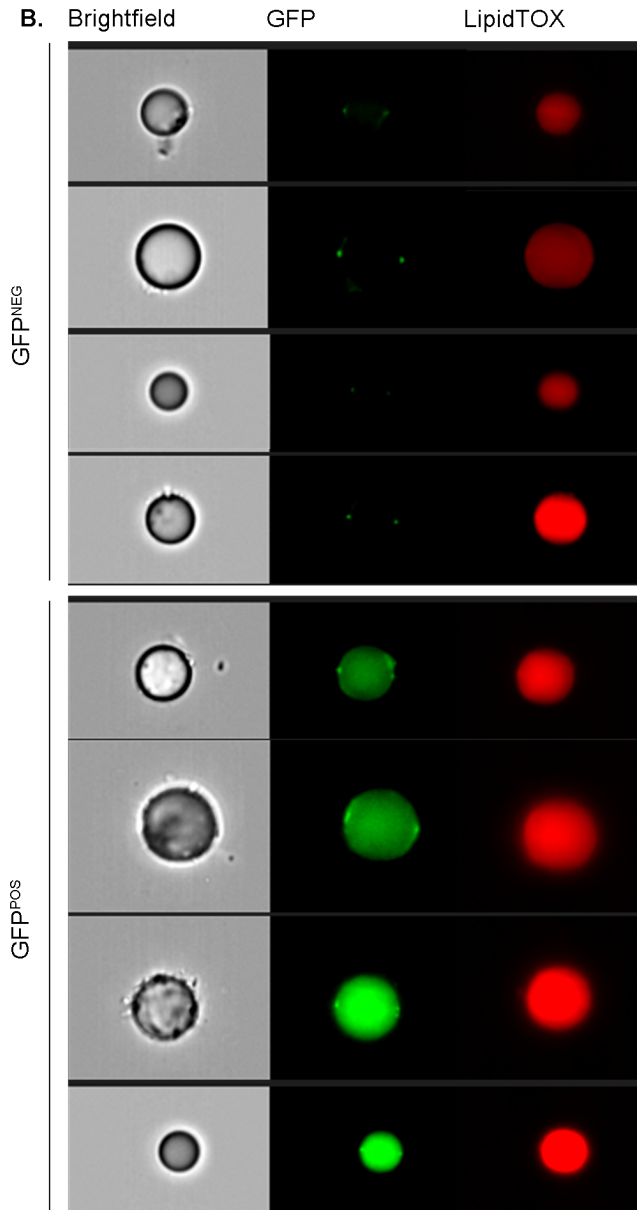

**Supplementary Figure 3. GFP<sup>POS</sup> HSCDAs are present in Competent mice, but not in Ablated mice.** **A)** Representative fluorescence microscope images shows the presence of GFP-expressing adipocytes among non-fluorescent cells in free-floating adipocytes from Competent mice. GFP<sup>POS</sup> adipocytes were not routinely observed in Ablated animals. **B)** Imaging flow cytometry confirmed the presence of unilocular lipid-containing (LipidTOX<sup>POS</sup>) cells expressing GFP under the control of the adiponectin gene promoter (AdipoQ) or GFP-deficient wild type cells in Competent mice.

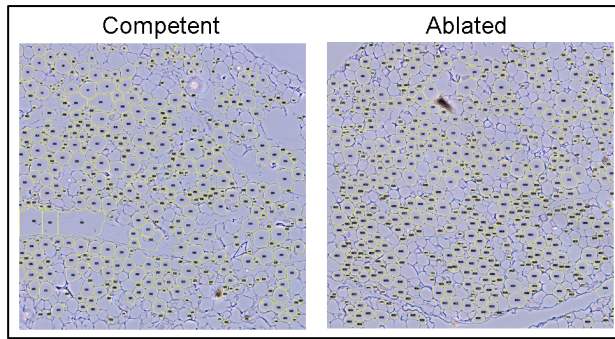

**Supplementary Figure 4. AdipoSoft/FIJI images of adipocyte sizing.** Representative phase contrast images of Competent and Ablated adipose tissue sections were acquired at 4X magnification. Unprocessed .tiff image files were processed using the Adiposoft plug-in with FIJI to obtain adipocyte morphology.

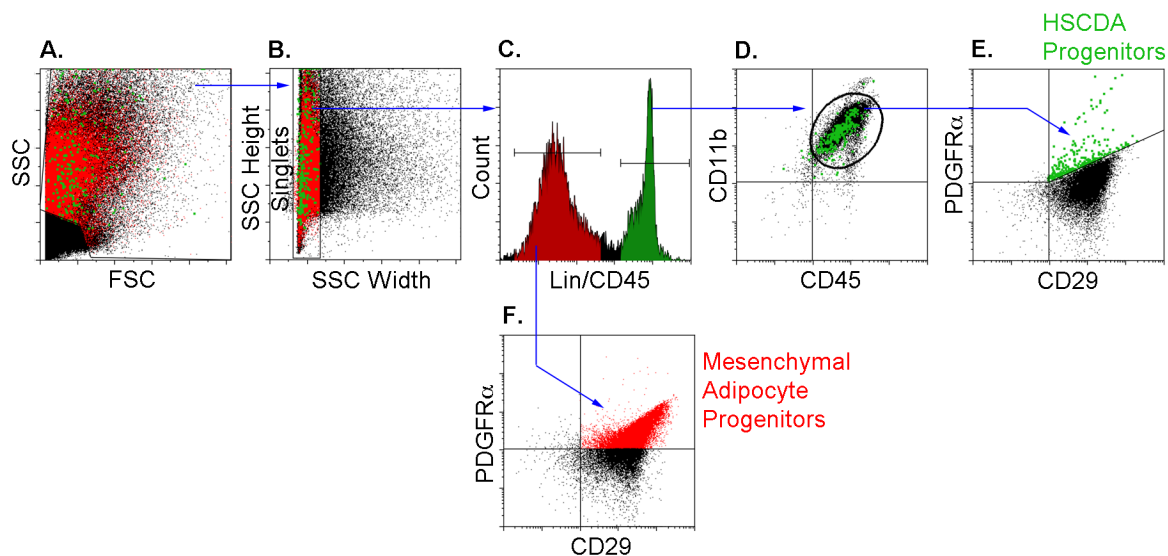

**Supplementary Figure 5. Flow cytometry gating scheme for the isolation of HSCDA progenitors and conventional mesenchymal adipocyte progenitors.** **A)** Small debris was removed from the cell population by a combination of forward scatter (FSC) and side scatter (SSC) gating. **B)** Single cells are isolated from clusters of cells by SSC Height versus SSC Width gating. **C)** Hematopoietic cells (green peak) expressing either Lin (leage) surface markers or CD45 were separated from mesenchymal cells (red peak). **D)** The hematopoietic population from (C) was found to consist primarily (>95%) of CD45<sup>POS</sup>/CD11b<sup>POS</sup> myeloid cells. **E)** A small portion of the stromal myeloid cells expressed the mesenchymal progenitors markers CD29 and PDGFR $\alpha$ , and were designated HSCDA progenitors. **F)** Most of the mesenchymal cells in (C) expressed CD29, with a substantial portion also expressing PDGFR $\alpha$ . These cells were designated mesenchymal adipocyte progenitors.

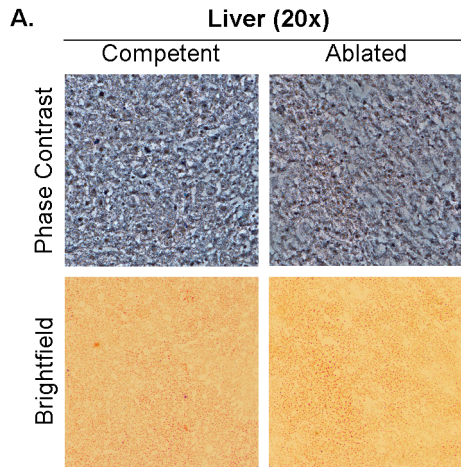

**Supplementary Figure 6. HSCDA ablation does not elicit lipid deposition in liver or skeletal muscle.**

Liver and gastrocnemius muscle were harvested from Competent and Ablated mice and frozen in OTC. Five um sections were stained with Oil Red O solution for 10 min, briefly rinsed with 70% isopropanol then washed extensively in water. Representative Phase contrast and brightfield images are shown.

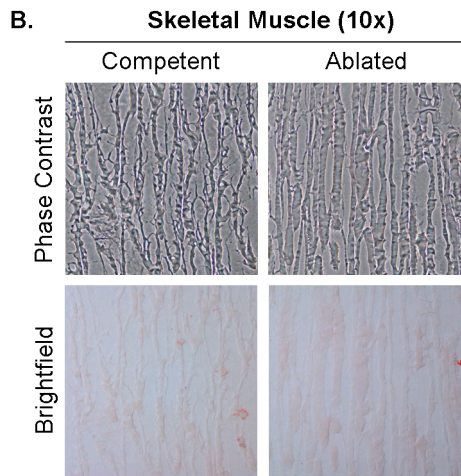



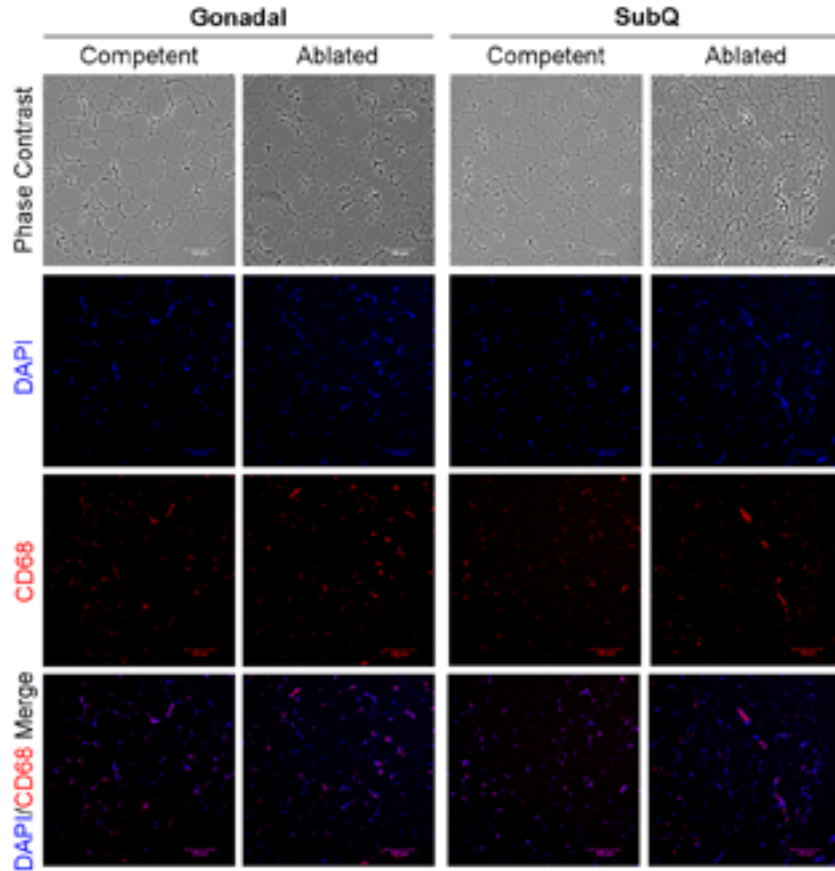

**Supplementary Figure 7. Crown-like structures in the gonadal and subcutaneous (SubQ) adipose tissue of Competent and Ablated mice.** Gonadal and subcutaneous adipose tissue from Competent and Ablated mice was fixed, paraffin-embedded and sectioned. Deparaffinized and hydrated sections were stained overnight with antibodies to the mouse macrophage marker, CD68 and counterstained with an Alexa 555-conjugated secondary antibody. Representative phase contrast images show adipose tissue structure. Fluorescent images show DAPI-stained nuclei (blue), CD68 (red) and merged areas in magenta. All images 10x.

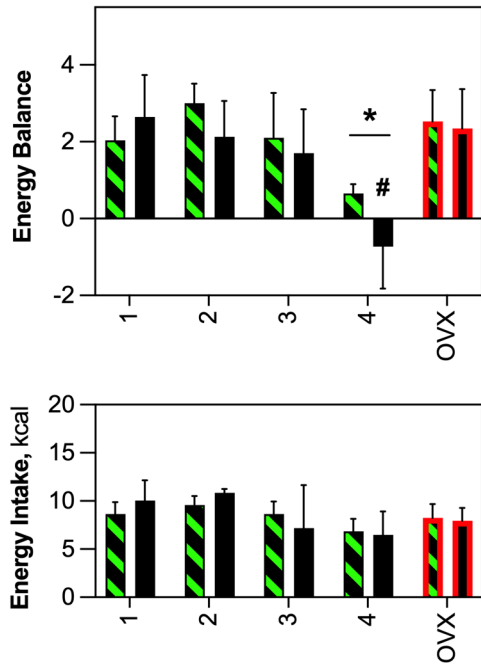

**Supplementary Figure 8. Daily changes in energy balance and energy intake in Competent and Ablated mice.** Surgery-naïve (thin black borders) or ovariectomized (OVX, thick red borders) Competent (black and green crosshatched) and Ablated (solid black) mice were housed individually in calorimetry chambers and acclimated for 72 hours. Energy balance and energy intake were then measured over a period of 96 hours. These parameters were relatively constant over the first 72 hours of the measurement period for surgery-naïve Competent mice or for both OVX cohorts. Energy balance declined on day 4 for the surgery-naïve Competent animals.
